1  
2  
3 **BOLD response to multiple grip forces in MS: going beyond the main effect of**  
4 **movement in BA 4a and BA 4p**  
5

6  
7 Adnan A.S. Alahmadi<sup>1,2\*</sup>, Matteo Pardini<sup>2,3</sup>, Rebecca S Samson<sup>2</sup>, Egidio D'Angelo<sup>4,5</sup>,  
8 Karl J Friston<sup>6</sup>, Ahmed T Toosy<sup>2</sup>, Claudia A.M. Gandini Wheeler-Kingshott<sup>2,4,5</sup>  
9

10 <sup>1</sup> Department of Diagnostic Radiology, Faculty of Applied Medical Science, KAU, Jeddah, SA, <sup>2</sup>NMR  
11 Research Unit, Department of Neuroinflammation, Queen Square MS Centre, UCL Queen Square Institute of  
12 Neurology, London, UK, <sup>3</sup>Department of Neuroscience, Rehabilitation, Ophthalmology, Genetics, Maternal and  
13 Child Health (DINOGMI, Department of Excellence of the Italian Ministry of University and Research),  
14 University of Genoa, Largo Daneo 3, 16132, Genoa, Italy; IRCCS Ospedale Policlinico San Martino, Largo  
15 Benzi 10, 16132, Genoa, Italy, <sup>4</sup>Brain Connectivity Center, IRCCS Mondino Foundation, Pavia, Italy,  
16 <sup>5</sup>Department of Brain and Behavioural Sciences, University of Pavia, Italy, <sup>6</sup>Wellcome Centre for Imaging  
17 Neuroscience, UCL Queen Square Institute of Neurology, University College London, London, UK, <sup>7</sup>

18  
19  
20  
21 \*Address correspondence to Adnan Alahmadi.

22 Address: 1: Department of Neuroinflammation UCL Institute of Neurology, Queen Square MS Centre, Russell Square House, London  
23 WC1B 5EH Tel: +44 2031087401; 2: Department of Diagnostic Radiology, College of Applied Medical Science, King Abdulaziz  
24 University (KAU), Jeddah, Saudi Arabia  
25  
26  
27

28 **Short title:** Effects of forces on the sub-divisions of BA 4 in MS  
29  
30  
31  
32  
33  
34  
35  
36

37

38 **Abstract:**

39 This study highlights the importance of looking beyond the main effect of movement to study  
40 alterations in functional response in the presence of central nervous system pathologies such  
41 as multiple sclerosis (MS). Data show that MS selectively affects regional BOLD (Blood  
42 Oxygenation Level Dependent) responses to variable grip forces (GF). It is known that the  
43 anterior and posterior BA 4 areas (BA 4a and BA 4p) are anatomically and functionally distinct.  
44 It has also been shown in Healthy volunteers that there are linear (1<sup>st</sup> order, typical of BA 4a)  
45 and non-linear (2<sup>nd</sup>-4<sup>th</sup> order, typical of BA 4p) BOLD responses to different levels of GF  
46 applied during a dynamic motor paradigm. After modelling the BOLD response with a  
47 polynomial expansion of the applied GFs, the particular case of BA 4a and BA 4p were  
48 investigated in Healthy Volunteers (HV) and MS subjects. The main effect of movement (0<sup>th</sup>  
49 order) analysis showed that the BOLD signal is greater in MS compared to healthy volunteers  
50 within both BA 4 sub-regions. At higher order, BOLD-GF responses were similar in BA 4a but  
51 showed a marked alteration in BA 4p of MS subjects, with those with greatest disability  
52 showing the greatest deviations from the healthy response profile. Therefore, the different  
53 behaviour in HV and MS could only be uncovered through a polynomial analysis looking  
54 beyond the main effect of movement into the two BA 4 sub-regions. Future studies will  
55 investigate the source of this pathophysiology, combining the present fMRI paradigm with  
56 blood perfusion and non-linear neuronal response analysis.

57

58 **Key words:** BA 4p, BA 4a, fMRI, Force, Multiple Sclerosis

59

60

61

62 **1. Introduction:**

63 The primary motor cortex, M1 or Brodmann area 4 (BA 4) is very important because of its  
64 essential role in generating movement, a skill often affected by diseases such as Multiple  
65 Sclerosis (MS). Interestingly, BA 4 has two sub-regions with distinct cytoarchitectonic  
66 properties, anatomy, and neurochemistry both in humans and primates (Strick and Preston,  
67 1982, Geyer et al., 1996, Kaas and Collins, 2002). Geyer et al showed that the two sub-divisions  
68 have differences in transmitter binding sites and laminar density of neurons (Geyer et al. 1996).  
69 In particular, they showed that BA 4a has more densely packed pyramidal cells. On the other  
70 hand, BA 4p has higher laminar specific densities of different receptor and transmitter binding  
71 sites.

72

73 Magnetic Resonance Imaging (MRI) functional studies have shown that in healthy volunteers  
74 the blood oxygen level dependent (BOLD) signal response is modulated by attention  
75 (Binkofski et al., 2002) and imagined forces (Sharma et al., 2008) in BA 4p, whilst BA 4a  
76 responds to motor control (Alahmadi et al., 2016). In other words, BA 4a is predominantly  
77 related to execution whereas BA 4p is predominantly related to higher-order cognitive tasks  
78 (Sharma et al., 2008, Binkofski et al., 2002, Alahmadi, 2020, Alahmadi et al., 2015b, Alahmadi  
79 et al., 2017, Alahmadi et al., 2016).

80

81 A recent study of healthy volunteers has revealed that the BOLD response to complex motor  
82 tasks, involving different grip forces (GFs), is characterised by different MRI signal response  
83 profiles, even during observation (Alahmadi et al., 2016, Casiraghi et al., 2019, Keisker et al.,  
84 2009). Interestingly, the study reported a distinct behaviour of the BOLD-GF relationship  
85 within the two sub-regions of BA 4 (Alahmadi et al., 2016). The BOLD-GF relationship

86 follows a distinct non-linear negative third order profile within BA 4p, while it is linear in BA  
87 4a. Moreover, in healthy volunteers the BOLD signal within the two sub-regions has a distinct  
88 response to motor complexity, when using the dominant or non-dominant hand while applying  
89 different GFs (Alahmadi et al., 2015b). Therefore, the functional differences between BA 4a  
90 and BA 4p provide an ideal case to compare complex BOLD responses going beyond the 0-  
91 order (or main effect) of movement in a pathology like MS.

92

93 A question arises as to whether and if so how, these behaviours are affected by aging and by  
94 diseases of the central nervous system, warranting a full characterization of the BOLD  
95 behaviour in these two sub-regions, beyond a standard main effect of movement. Some  
96 investigations have reported, indirectly, that there are distinct responses in BA 4p and BA 4a  
97 in aging (Ward and Frackowiak, 2003) and in stroke patients (Ward et al., 2007). In particular,  
98 they showed that BA 4p is affected by aging and that it is key to the functional integrity of the  
99 cortical-spinal system and motor recovery in patients with stroke. Therefore, advanced analysis  
100 of BA 4a and BA 4p could highlight mechanisms of functional alterations otherwise shadowed  
101 in an undifferentiated analysis of BA 4.

102

103 On the bases of these considerations, the present study investigates the non-linear behaviour of  
104 the BOLD response to different GFs within BA 4a and BA 4p, in healthy volunteers and in  
105 people with MS, a neurological disease known to affect the motor system. MS has complex  
106 disease mechanisms involving a number of pathophysiological components, including  
107 demyelination, axonal loss and inflammation. Accumulation of sodium ions in tissue and a  
108 redistribution of sodium channels along damaged axons alters conduction properties (Paling et  
109 al., 2013, Cercignani et al., 2017), which could also be affected by alterations of tissue blood  
110 perfusion (Bester et al., 2015, Rashid et al., 2004, Paling et al., 2014, Rovaris et al., 2002,

111 Lapointe et al., 2018, Rocca et al., 2007). fMRI studies in MS have shown altered patterns of  
112 activations (Rocca et al., 2007, Filippi et al., 2013, White et al., 2009) and altered resting state  
113 networks (Castellazzi et al., 2018), but were not designed to answer questions about complex  
114 BOLD behaviour.

115

116 The hypothesis of this study is therefore that, in MS, there is (1) an altered functional response  
117 in BA 4 compared to healthy volunteers during a motor fMRI task and that (2) this alteration  
118 is region-specific. Given the involvement of BA 4p in higher-order motor control and its  
119 modulation by attention and task complexity we also hypothesised that (3) area BA 4p may  
120 show more severe abnormalities than BA 4a in the presence of MS pathology when compared  
121 to healthy volunteers. If this is true, then the BOLD-GF relationship in BA 4a and BA 4p may  
122 show different regional patterns of alteration compared to Healthy volunteers, offering new  
123 insights in the pathology of MS.

124

125

126

## 127 2. **Methods:**

### 128 2.1. Subjects:

129 14 right-handed healthy volunteers (9 female, 5 male; mean age 31 ( $\pm$  4.64) years) and 14 right-  
130 handed relapsing remitting MS (RRMS) patients (10 female, 4 male; mean age 35 ( $\pm$  5.36)  
131 years; median (range) expanded disability status score (EDSS) 3.5 (1.5-6.5)); median (range)  
132 9-Hole Peg Test (9-HPT) = 20.05 (14.7-33.1) were recruited. The handedness of subjects were  
133 assessed according to the Edinburgh handedness scaling questionnaire (Oldfield, 1971). All  
134 subjects gave informed consent and the study was approved by the local research and ethics  
135 committee.

136

137        2.2. MRI acquisition:

138        A 3.0 T MRI scanner Philips Achieva system (Philips Healthcare, Best, The Netherlands) and  
139        a 32-channel head coil were used. The imaging acquisition protocol included the following:  
140        T1-weighted volume (3DT1): 3D inversion-recovery prepared gradient-echo (fast field echo)  
141        sequence with inversion time (TI) = 824ms, echo time (TE)/repetition time (TR) = 3.1/6.9ms,  
142        flip angle = 8° and voxel size = 1mm isotropic; BOLD sensitive T2\*-weighted echo planar  
143        imaging (EPI): TE/TR = 35/2500ms, voxel size = 3×3×2.7 mm<sup>3</sup>, inter-slice gap of 0.3 mm,  
144        SENSE factor = 2, number of slices = 46, acquired with descending order, field of view =  
145        192×192mm<sup>2</sup>, number of volumes = 200, number of dummy scans = 5, flip angle = 90°.

146

147        2.3. fMRI paradigm:

148        The experimental design was a *visually* guided event-related fMRI paradigm, where subjects  
149        used their right (dominant) hand to squeeze a rubber ball with varying GF levels. The design  
150        comprised 5 GF targets (20, 30, 40, 50 and 60% of subjects' maximum voluntary contraction  
151        (MVC)) interleaved with rest intervals, each repeated randomly 15 times. This paradigm has  
152        been validated previously in studies of Healthy volunteers (Alahmadi et al., 2015b, Casiraghi  
153        et al., 2019, Alahmadi et al., 2017, Alahmadi et al., 2016).

154

155        Before the fMRI session, subjects were given a 6 minute training session including learning,  
156        watching and performing a similar but not identical paradigm. During the fMRI session,  
157        participants lay supine on the scanner bed throughout the experiment and were instructed to  
158        extend both of their arms in a relaxed comfortable position. A support hand pad was provided  
159        for each subject to ensure comfort and compliance.

160

161        2.4. Image pre-processing and analyses:

162        Data processing was performed using statistical parametric mapping (SPM12  
163        ([www.fil.ion.ucl.ac.uk/spm](http://www.fil.ion.ucl.ac.uk/spm)) implemented in Matlab14b (Mathworks, Sheborn, MA). The pre-  
164        processing steps for each subject adopted the following fMRI pipeline: Slice time corrections;  
165        Spatial volume realignments; (iii) Co-registration with the 3DT1 volume; (iv) Normalization  
166        with the tissue probability maps of SPM12; (v) Smoothing of the functional volumes with an  
167        8mm isotropic full-width half maximum (FWHM) Gaussian kernel.

168        2.5. Statistical analysis:

169        *Within-subjects (first level analysis):* Signal changes were modelled using a polynomial  
170        expansion as described in (Alahmadi et al., 2016) and according to (Buchel et al., 1998, Buchel  
171        et al., 1996). Briefly, for each subject, a fixed effects analysis was performed. To test efficiently  
172        for linear and nonlinear effects, a parametric design was chosen. The parametric design  
173        included a set of orthogonalised polynomial orders (up to the fourth order) and was specified  
174        by the integral of the forces for each subject. This step creates five regressors of interest: 0<sup>th</sup>  
175        order represents the main effect of gripping regardless of the applied force, 1<sup>st</sup> order represents  
176        any linear changes between BOLD signals and the applied forces, and 2<sup>nd</sup> – 4<sup>th</sup> orders represent  
177        nonlinear effects modelling the relationships between BOLD signals and the applied forces.  
178        These covariates were then convolved with a canonical hemodynamic response function (HRF)  
179        for standard SPM and general linear model (GLM) analysis (Friston et al., 1995). The  
180        movement related realignment parameters were included as regressors of no interest in each  
181        GLM (Friston et al., 1996). At this within-subject level, *t*-statistics were used to test for the  
182        effects of the polynomial coefficients.

183        *Between-subjects (second level analysis):* Contrast images from the within-subject analysis for  
184        the five polynomial orders were entered into random effects analyses, testing for non-linear

185 effects within and between groups, with the appropriate *t*-tests (i.e. one sample *t*-test for the  
186 within group tests and two sample *t*-test for between group comparisons). Significant voxels  
187 were defined using  $P < 0.05$ , corrected for multiple comparisons (FWE). Importantly, the  
188 number of comparisons (voxels) performed in this study was within the sub-regions of BA 4,  
189 thus the numbers of comparisons were low as compared to the whole brain.

190

191 In addition to the above whole brain SPM analysis, BA 4 was defined and subdivided according  
192 to (Eickhoff et al., 2005) as guided by (Geyer et al., 1996) (figure 1). The study by Eickhoff et  
193 al. 2005 introduced a new probabilistic cytoarchitectonic map of different brain regions  
194 (including BA 4), which significantly improved the accuracy of anatomical labelling. The new  
195 cytoarchitectonic map measured the probability of a single voxel falling within an area based  
196 on 10 post-mortem brains normalized to the MNI single subject template. Only voxels (or  
197 clusters) having the highest probability of falling within the MNI sub-division of BA 4 were  
198 considered for each *post mortem* subject and were used to define a map of BA 4 in MNI space.  
199 Since this is an *a priori* predefined region of interest (ROI), we used this anatomical ROI for  
200 each subject and performed small volume correction (SVC) to increase our sensitivity when  
201 looking at individual subject behaviours and parametric effects. To assess the relationship  
202 between BOLD signal and GF, we plotted the average group signal estimate over voxels within  
203 these predefined ROIs for either BA 4a or BA 4p. Each plot therefore reports the maximum  
204 likelihood estimates of the mapping between the different applied GF and BOLD signals based  
205 on the polynomial expansion (Alahmadi et al., 2016).

206

207 To better understand the effect of disability on BOLD responses to GF, we divided the MS  
208 group based on their EDSS score into two sub-groups of low ( $EDSS \leq 3$ ) and high disability  
209 ( $EDSS > 3$ ). The 9-HPT was highly correlated with the EDSS scores and thus the two groups



210 could be sub-divided similarly to low (9 HPT  $\leq$ 21.7) and high disability (9-HPT  $>$  21.7).  
211 Following the sub-division of the MS group, the low EDSS group comprised 8 subjects (4  
212 female, 4 male; mean age 33.8 ( $\pm$  4.5) years; median (range) EDSS 1.5 (1.5 – 2.5); median  
213 (range) 9-Hole Peg Test (9-HPT) = 19.1 (14.7-22.1)), while the high EDSS group comprised  
214 the remaining 6 subjects (5 female, 1 male; mean age 36.1 ( $\pm$  7.8) years; median (range) EDSS  
215 6 (3.5 – 6.5); median (range) 9-Hole Peg Test (9-HPT) = 25 (22.3-33.1)).

216

217 In order to characterise the response profile of each sub-division in each group, we used the  
218 relative contribution of each polynomial term as described in Alahmadi et al. 2015b. We  
219 therefore classified the effect of GF at each voxel within BA 4a and BA 4p based on the  
220 polynomial order that showed the highest standardised group effect size (i.e. the most  
221 significant group difference).

222

### 223 3. **Results:**

224 All subjects were able to perform the task correctly (table.1).

225 In this study, we report five major findings:

#### 226 3.1. Main effect of movement:

227 Both groups activated BA 4a and BA 4p (figure 2 and figure 3). RRMS patients showed  
228 increased and greater activation extent compared to Healthy volunteers in both BA 4a and BA  
229 4p sub-regions (figure 2 & figure 3) (p-value=0.001). RRMS patients also showed increased  
230 activations as their EDSS increased within BA 4p only (p-value=0.001) (figure 4).

#### 231 3.2. Average BOLD relationship with GF in BA 4a:

232 In both groups, significant relationships were detected between BOLD signal and GF. There  
233 were no differences detected between MS subjects and Healthy volunteers in terms of the  
234 relationship between BOLD signal and GF within BA 4a (figure-5).

235        3.3. Average BOLD relationship with GF in BA 4p:

236        In patients with low EDSS, the BOLD-GF relationship was very similar to Healthy volunteers  
237        (mainly negative 3<sup>rd</sup> order), whereas at higher EDSS, the predicted BOLD versus GF deviated  
238        from the Healthy volunteers pattern and the BA 4a pattern (figure 6, 3<sup>rd</sup> column).

239        3.4. GF Response profile in single subjects:

240        Interestingly, the profile of the mean BOLD signal versus GF was very similar across  
241        individual subjects, when grouping subjects by disease stage. Figure 5-6 show the maximum  
242        likelihood estimates of the mapping between the applied GF and BOLD signals based on the  
243        polynomial expansion at the group and subject levels.

244

245        3.5. Categorizing effect sizes:

246        Performing a post-hoc analysis to identify the polynomial order showing the highest effect size,  
247        we showed that in both groups (healthy and MS) the 1<sup>st</sup> order effect was predominant within  
248        BA 4a. On the other hand, the predominant effect within BA 4p was different in the two groups.  
249        In Healthy volunteers, a negative 3<sup>rd</sup> order effect was predominant while in MS a positive (U-  
250        shaped) 2<sup>nd</sup> order effect was predominant, with BOLD signal increasing with the highest force  
251        in MS, which elicited the lowest BOLD response in Healthy volunteers. See supplementary  
252        material.

253

254        **4. Discussion:**

255        In this study, we demonstrate the importance of characterising high-order BOLD responses to  
256        GF as opposed to simply assessing group differences in the main effect of movement (0-order)  
257        between patients and healthy controls in pathologies such as MS. This characterisation was  
258        performed within the sub-divisions of the primary motor region (BA 4a and BA 4p), which  
259        present different order response to the intensity of movement (Alahmadi et al., 2015a,

260 Alahmadi, 2020, Alahmadi et al., 2016). The main findings are that there are distinct grip (i.e.  
261 main effect) and force level effects within these two sub-regions in healthy and MS subjects.  
262 We further demonstrated that the main effect of gripping and the non-linear BOLD-GF  
263 relationship within BA 4p changes with disease progression.

264 A key finding is that the non-linear relationship between BOLD response and GF was  
265 confirmed in both Healthy volunteers and MS groups and that in people with MS it was  
266 distinctly altered only in BA 4p (figure 6). This result can be supported by the fact that the  
267 neuronal and cellular structures as well as chemistry of these two sub-regions are different  
268 (Strick and Preston, 1982, Geyer et al., 1996, Kaas and Collins, 2002). Thus, pathologies such  
269 as MS could additionally affect these two sub-regions differentially. Focusing on BA 4a and  
270 4p enabled us to characterise the BOLD signal response based on its relationship to increasing  
271 GF, assessing its sensitivity to pathological changes at a sub-regional level.

272 BA 4 as a whole responded to the main effect of grip in both MS and healthy control groups.  
273 This is in line with previous motor gripping studies that showed the role of BA 4 in motor  
274 generation and function (Rocca et al., 2007, White et al., 2009, Kuhtz-Buschbeck et al., 2008,  
275 Kuhtz-Buschbeck et al., 2001, Keisker et al., 2009).

276 This distinct functional segregation and parametric responses was effectively captured by this  
277 study. Indeed, our findings regarding the main effect of movement show that both sub-regions  
278 are activated within both groups. The responses though are different within the two sub-regions  
279 as the BOLD signal was significantly increased in MS compared to the healthy group,  
280 especially in BA 4p (figure 2 & 3). Previous reports of motor functional studies illustrate  
281 different outcomes in the main effect of movement (within BA 4 as a whole) in MS, with the  
282 BOLD signal response shown to either increase (Lee et al., 2000, White et al., 2009, Reddy et  
283 al., 2000) or to have no difference compared to Healthy volunteers (White et al., 2009, Mancini

284 et al., 2009). Unfortunately, most of these studies used automated anatomical labelling that  
285 relies on a template (e.g. the Talairach) or manual eye assessment labelling, both of which are  
286 highly prone to inaccuracy and difficult to generalize. The other limiting factor is that most of  
287 these studies were not anatomically specific for BA 4a or BA 4p (e.g. both M1 and S1 (primary  
288 sensory area) were labelled as “sensorimotor cortex” or SMC). This makes comparisons  
289 between our results and earlier studies difficult. The inconsistency among earlier studies can  
290 be attributed to factors such as differences in paradigms, number of subjects, threshold values,  
291 and MS subtypes. The last factor, i.e. MS subtype, may be very significant in affecting outcome  
292 as functional activations have been shown to be altered during disease progression (Rocca et  
293 al., 2005) (Rocca et al., 2005). More importantly, it has been suggested that MS patients during  
294 the early stage of the disease tend to have normal patterns of activation (Pantano et al., 2015).

295 This study goes beyond the main effect of movement and shows that the non-linear relationship  
296 BOLD-GFs within BA 4 is complex and region-specific. In previous studies of Healthy  
297 volunteers we have demonstrated the complexity of BOLD signals as a function of GF in  
298 different motor, sub-motor, associative and cerebellar areas (Alahmadi et al., 2015b, Alahmadi  
299 et al., 2017, Alahmadi et al., 2016, Casiraghi et al., 2019). These were seen as well in action  
300 observation and execution networks (Casiraghi et al., 2019). In the present study, we show that  
301 pathology affects the BOLD-GF relationship differently in BA 4a and BA 4p and that the  
302 altered behaviour was indicative of high EDSS. What was particularly striking was the  
303 consistency of the profile between individual subjects, reflecting the group level findings  
304 (figures 5 & 6).

305

306 The observation that the BOLD response to different GFs within BA 4p was similar to that of  
307 Healthy volunteers in patients with low EDSS, while it was consistently altered at higher EDSS

308 poses interesting mechanistic questions, suggesting that differences not only in  
309 cytoarchitecture but also in chemoarchitecture and myeloarchitecture of these two sub-regions  
310 may translate into differences in their susceptibility to MS pathology. For example, these  
311 architecture properties as well as differences in the distribution of neural cells densities within  
312 the two sub-regions (Geyer et al., 1996) could be altered or be the cause of alterations in  
313 myelination, axonal loss, vascular or neuronal activity in MS. One could speculate that given  
314 the rich density of neurotransmitters in BA 4p compared to BA 4a (Geyer et al., 1996), our  
315 observations could reflect an impaired neuronal response. With the present data, though, it is  
316 not possible to link the present functional findings to tissue microstructure alterations, nor to  
317 infer a causal relationship between an impaired functional response to a complex task and blood  
318 perfusion, microvascular response, or even sodium channels malfunction, all of which are  
319 known to be regionally affected and potentially responsible for our observations. Furthermore,  
320 these differences could be due to differences in their structural connectivity to other brain  
321 regions that could potentially drive this different behaviour. Thus, our findings underline the  
322 need for multi-modal and longitudinal studies that could include other quantitative techniques  
323 such as diffusion weighted imaging (DWI) (to assess tissue microstructure and connectivity),  
324 MR spectroscopy (to assess metabolic changes), sodium imaging (to assess effects of sodium  
325 ions tissue distribution essential for neurotransmission), grey matter sensitive sequences (to  
326 assess grey matter atrophy and lesions) and perfusion imaging to pin down mechanistic  
327 hypothesis and deliver sensitive and specific *in vivo* imaging biomarkers of the functional  
328 substrate of MS alterations; we believe that it is really important to go beyond reporting the  
329 main effect of movement, i.e a change in BOLD signal amplitude.

330

331 The fact that these behaviours reflected EDSS association is also of interest. Previous studies  
332 have suggested that changes in functional activations in MS are possibly related to

333 compensatory mechanisms (Staffen et al., 2002, Audoin et al., 2003, Lenzi et al., 2007,  
334 Mainero et al., 2004b), which could also be advocated to explain the higher activations  
335 observed in the main effect of gripping in MS compared to healthy volunteers. It should be  
336 noted, however, that previous studies showed that BA 4p is involved in executive motor  
337 function tasks compared to BA 4a. The predominant reported factors for BA 4p involvement  
338 were attention (Binkofski et al., 2002), complexity (Alahmadi et al., 2016) and imagination  
339 (Sharma et al., 2008). In the current study, these factors, especially attention and complexity,  
340 are all invoked by task execution. The use of an increased GF increases the complexity of  
341 performance and the use of visual feedback to reach (as quickly as possible) and maintain (as  
342 precisely as possible) forces at a specific level (especially low and high GFs) requires increased  
343 attention. Previous reports showing that in MS there are functional alterations with task  
344 complexity (Filippi et al., 2002) and attention (Mainero et al., 2004a), may support our finding  
345 of increased functional changes in BA 4p. A positive correlation of the BOLD effect with  
346 EDSS, though, indicates that this increased activity may either be a failed compensatory  
347 mechanism or may not be compensatory after all, but rather maladaptive. Advanced network  
348 modeling of the functional signal behavior may assist in understanding the source of these  
349 alterations (Friston et al., 2003). Dynamic causal modeling (DCM) would be a possible analysis  
350 to perform to help understand the precise nature of the non-linearity in the BOLD response at  
351 the neuronal or hemodynamic level. Given that the most interesting hemodynamic  
352 nonlinearities emerge over a timescale of seconds, due to hemodynamic saturation effects  
353 (Friston et al., 2003, Friston et al., 1996, Friston et al., 1998, Friston et al., 2000), a revised  
354 paradigm that includes variations in the GF duration as well as strength would be desirable for  
355 future experiments.

356

357

358 *Limitations and methodological considerations*

359 In this study, there are some methodological considerations to disclose. The number of subjects  
360 could be considered to be relatively low. This is especially relevant when sub-dividing the MS  
361 subjects into two different groups. However, the subdivision of patients into two groups is  
362 exploratory and the study was not powered for it. Given the striking results, though, it is  
363 important to report these findings, which could drive future larger studies. Another limitation  
364 of this study is the inability to investigate lesions within the targeted ROIs (i.e. BA 4). Grey  
365 matter lesions in MS have been reported using MRI (Sethi et al., 2012, Geurts et al., 2011).  
366 However, grey matter lesion sequences were not planned here, although the authors advocate  
367 the need to include a grey matter lesion sequence in future functional MRI studies of MS.

368

369

370 **5. Conclusion:**

371 BA 4 has two sub-divisions (BA 4p and BA 4a) that are anatomically and functionally distinct;  
372 therefore, BA 4 lends itself very well to the investigation of sub-regional differences in  
373 functional response to complex motor tasks in healthy and MS subjects. Here, we demonstrated  
374 region-specific alternations in the BOLD response to movement, showing that we should  
375 investigate beyond the main effect to unveil altered non-linear coupling between the BOLD  
376 signals and GFs, especially within BA 4p. The information obtained from studying the BOLD-  
377 GF relationship could reflect not only disease activity, but also the degree of morbidity.  
378 Furthermore, the alteration of the BOLD-GF profile in high EDSS patients compared to  
379 Healthy volunteers is a very interesting finding that opens an entire new set of avenues to study  
380 the mechanisms of neurological diseases *in vivo*. For example, the consistent alteration of the

381 BOLD-GF profile in BA 4p in the advanced stage of MS could be explained by many factors:  
382 perhaps demyelination of BA 4p itself, which could make it unable to support an efficient  
383 functional response? Or perhaps white matter fibers subtending BA 4p have redistributed  
384 sodium channels that – instead of supporting functionality – impair efficient  
385 neurotransmission? Or perhaps in MS the microvascular response is impaired with a regional  
386 specificity that makes BA 4p responding differently than BA 4a? These questions highlight the  
387 need for multi-modal cross-sectional and longitudinal studies that aim at disentangling the  
388 contribution to functional alterations of many factors, in order to pin down sensitive and  
389 specific *in vivo* imaging biomarkers.

## 390 **6. Acknowledgements:**

391 CGWK receives funds from the UK MS Society (#77), Wings for Life (#169111), Horizon2020 (CDS-  
392 QUAMRI, #634541), BRC (#BRC704/CAP/CGW); AA was supported by KAU. MP was supported by the  
393 AKWO association, Lavagna (Italy). KJF is supported by the Wellcome trust. RS also receives funding  
394 from the UK MS Society (#77) and the NMR Research Unit, Queen Square MS Centre receives support  
395 from the UCL-UCLH Biomedical Research Centre. ED was supported by the European Union's Horizon  
396 2020 Framework Programme for Research and Innovation under Specific Grant Agreement 720270  
397 (Human Brain Project SGA1) and 785907 (Human Brain Project SGA2), with specific involvement of the  
398 CDP2 subproject. The work was also sponsored by the MNL project of the Centro Fermi (Rome,  
399 Italy). ATT is supported by grants from Rosetrees Trust (MS632), UK MS Society (984) and Medical  
400 Research Council (MR/S026088/1).

401  
402  
403

404

405

406



407 **7. References:**

408

409

410 ALAHMADI, A., PARDINI, M., CORTESE, R., CAWLEY, N., SAMSON, R., D'ANGELO, E., FRISTON, K.,  
411 TOOSY, A. & WHEELER-KINGSHOTT, C. Altered fMRI BOLD response to different grip force  
412 levels in multiple sclerosis: the specific case of BA 4p. ISMRM BC, 2015a UK, London. O21.

413 ALAHMADI, A. A. 2020. Functional network analysis of the sub-regions of the primary motor cortex  
414 during rest. *NeuroReport*, 31, 691-695.

415 ALAHMADI, A. A., PARDINI, M., SAMSON, R. S., D'ANGELO, E., FRISTON, K. J., TOOSY, A. T. & GANDINI  
416 WHEELER-KINGSHOTT, C. A. 2015b. Differential involvement of cortical and cerebellar areas  
417 using dominant and nondominant hands: An FMRI study. *Human brain mapping*, 36, 5079-  
418 5100.

419 ALAHMADI, A. A., PARDINI, M., SAMSON, R. S., FRISTON, K. J., TOOSY, A. T., D'ANGELO, E. & GANDINI  
420 WHEELER-KINGSHOTT, C. A. 2017. Cerebellar lobules and dentate nuclei mirror cortical force-  
421 related-BOLD responses: Beyond all (linear) expectations. *Human brain mapping*, 38, 2566-  
422 2579.

423 ALAHMADI, A. A., SAMSON, R. S., GASSTON, D., PARDINI, M., FRISTON, K. J., D'ANGELO, E., TOOSY, A.  
424 T. & WHEELER-KINGSHOTT, C. A. 2016. Complex motor task associated with non-linear BOLD  
425 responses in cerebro-cortical areas and cerebellum. *Brain Struct Funct*, 221, 2443-58.

426 AUDOIN, B., IBARROLA, D., RANJEVA, J. P., CONFORT-GOUNY, S., MALIKOVA, I., ALI-CHÉRIF, A.,  
427 PELLETIER, J. & COZZONE, P. 2003. Compensatory cortical activation observed by fMRI during  
428 a cognitive task at the earliest stage of MS. *Human Brain Mapping*, 20, 51-58.

429 BESTER, M., FORKERT, N. D., STELLMANN, J. P., ALY, L., DRABIK, A., YOUNG, K. L., HEESSEN, C., FIEHLER,  
430 J. & SIEMONSEN, S. 2015. Increased perfusion in normal appearing white matter in high  
431 inflammatory multiple sclerosis patients. *PLoS One*, 10, e0119356.

432 BINKOFSKI, F., FINK, G. R., GEYER, S., BUCCINO, G., GRUBER, O., SHAH, N. J., TAYLOR, J. G., SEITZ, R. J.,  
433 ZILLES, K. & FREUND, H.-J. 2002. Neural activity in human primary motor cortex areas 4a and  
434 4p is modulated differentially by attention to action. *Journal of Neurophysiology*, 88, 514-519.

435 BUCHEL, C., HOLMES, A. P., REES, G. & FRISTON, K. J. 1998. Characterizing stimulus-response functions  
436 using nonlinear regressors in parametric fMRI experiments. *Neuroimage*, 8, 140-8.

437 BUCHEL, C., WISE, R. J., MUMMERY, C. J., POLINE, J. B. & FRISTON, K. J. 1996. Nonlinear regression in  
438 parametric activation studies. *Neuroimage*, 4, 60-6.

439 CASIRAGHI, L., ALAHMADI, A. A., MONTEVERDI, A., PALESÌ, F., CASTELLAZZI, G., SAVINI, G., FRISTON,  
440 K., GANDINI WHEELER-KINGSHOTT, C. A. & D'ANGELO, E. 2019. I See Your Effort: Force-  
441 Related BOLD Effects in an Extended Action Execution–Observation Network Involving the  
442 Cerebellum. *Cerebral Cortex*, 29, 1351-1368.

443 CASTELLAZZI, G., DEBERNARD, L., MELZER, T. R., DALRYMPLE-ALFORD, J. C., D'ANGELO, E., MILLER, D.  
444 H., GANDINI WHEELER-KINGSHOTT, C. A. & MASON, D. F. 2018. Functional connectivity  
445 alterations reveal complex mechanisms based on clinical and radiological status in mild  
446 relapsing remitting multiple sclerosis. *Frontiers in neurology*, 9, 690.

447 CERCIGNANI, M., GIULIETTI, G., DOWELL, N. G., GABEL, M., BROAD, R., LEIGH, P. N., HARRISON, N. A.  
448 & BOZZALI, M. 2017. Characterizing axonal myelination within the healthy population: a tract-  
449 by-tract mapping of effects of age and gender on the fiber g-ratio. *Neurobiology of aging*, 49,  
450 109-118.

451 EICKHOFF, S. B., STEPHAN, K. E., MOHLBERG, H., GREFKES, C., FINK, G. R., AMUNTS, K. & ZILLES, K.  
452 2005. A new SPM toolbox for combining probabilistic cytoarchitectonic maps and functional  
453 imaging data. *Neuroimage*, 25, 1325-35.

454 FILIPPI, M., AGOSTA, F., SPINELLI, E. G. & ROCCA, M. A. 2013. Imaging resting state brain function in  
455 multiple sclerosis. *Journal of Neurology*, 260, 1709-1713.

- 456 FILIPPI, M., ROCCA, M., COLOMBO, B., FALINI, A., CODELLA, M., SCOTTI, G. & COMI, G. 2002. Functional  
457 magnetic resonance imaging correlates of fatigue in multiple sclerosis. *Neuroimage*, 15, 559-  
458 567.
- 459 FRISTON, K. J., HARRISON, L. & PENNY, W. 2003. Dynamic causal modeling. *Neuroimage*, 19, 1273-  
460 1302.
- 461 FRISTON, K. J., HOLMES, A., POLINE, J. B., PRICE, C. J. & FRITH, C. D. 1996. Detecting activations in PET  
462 and fMRI: levels of inference and power. *NeuroImage*, 4, 223-235.
- 463 FRISTON, K. J., HOLMES, A. P., WORSLEY, K. J., POLINE, J., FRITH, C. D. & FRACKOWIAK, R. S. 1995.  
464 Statistical parametric maps in functional imaging: a general linear approach. *Human brain*  
465 *mapping*, 2, 189-210.
- 466 FRISTON, K. J., JOSEPHS, O., REES, G. & TURNER, R. 1998. Nonlinear event-related responses in fMRI.  
467 *Magnetic resonance in medicine : official journal of the Society of Magnetic Resonance in*  
468 *Medicine / Society of Magnetic Resonance in Medicine*, 39, 41-52.
- 469 FRISTON, K. J., MECHELLI, A., TURNER, R. & PRICE, C. J. 2000. Nonlinear responses in fMRI: the Balloon  
470 model, Volterra kernels, and other hemodynamics. *NeuroImage*, 12, 466-77.
- 471 GEURTS, J., ROOSENDAAL, S., CALABRESE, M., CICCARELLI, O., AGOSTA, F., CHARD, D., GASS, A.,  
472 HUERGA, E., MORAAL, B. & PARETO, D. 2011. Consensus recommendations for MS cortical  
473 lesion scoring using double inversion recovery MRI. *Neurology*, 76, 418-424.
- 474 GEYER, S., LEDBERG, A., SCHLEICHER, A., KINOMURA, S., SCHORMANN, T., BÜRCEL, U., KLINGBERG, T.,  
475 LARSSON, J., ZILLES, K. & ROLAND, P. E. 1996. Two different areas within the primary motor  
476 cortex of man.
- 477 KAAS, J. H. & COLLINS, C. E. 2002. The organization of somatosensory cortex in anthropoid primates.  
478 *Advances in neurology*, 93, 57-67.
- 479 KEISKER, B., HEPP-REYMOND, M.-C., BLICKENSTORFER, A., MEYER, M. & KOLLIAS, S. S. 2009.  
480 Differential force scaling of fine-graded power grip force in the sensorimotor network. *Human*  
481 *brain mapping*, 30, 2453-65.
- 482 KUHTZ-BUSCHBECK, J. P., EHRSSON, H. H. & FORSSBERG, H. 2001. Human brain activity in the control  
483 of fine static precision grip forces: an fMRI study. *The European journal of neuroscience*, 14,  
484 382-90.
- 485 KUHTZ-BUSCHBECK, J. P., GILSTER, R., WOLFF, S., ULMER, S., SIEBNER, H. & JANSEN, O. 2008. Brain  
486 activity is similar during precision and power gripping with light force: an fMRI study.  
487 *Neuroimage*, 40, 1469-81.
- 488 LAPOINTE, E., LI, D., TRABOULSEE, A. & RAUSCHER, A. 2018. What have we learned from perfusion  
489 MRI in multiple sclerosis? *American Journal of Neuroradiology*, 39, 994-1000.
- 490 LEE, M., REDDY, H., JOHANSEN-BERG, H., PENDLEBURY, S., JENKINSON, M., SMITH, S., PALACE, J. &  
491 MATTHEWS, P. 2000. The motor cortex shows adaptive functional changes to brain injury from  
492 multiple sclerosis. *Annals of neurology*, 47, 606-613.
- 493 LENZI, D., CONTE, A., MAINERO, C., FRASCA, V., FUBELLI, F., TOTARO, P., CARAMIA, F., INGHILLERI, M.,  
494 POZZILLI, C. & PANTANO, P. 2007. Effect of corpus callosum damage on ipsilateral motor  
495 activation in patients with multiple sclerosis: A functional and anatomical study. *Human Brain*  
496 *Mapping*, 28, 636-644.
- 497 MAINERO, C., CARAMIA, F., POZZILLI, C., PISANI, A., PESTALOZZA, I., BORRIELLO, G., BOZZAO, L. &  
498 PANTANO, P. 2004a. fMRI evidence of brain reorganization during attention and memory  
499 tasks in multiple sclerosis. *NeuroImage*, 21, 858-867.
- 500 MAINERO, C., INGHILLERI, M., PANTANO, P., CONTE, A., LENZI, D., FRASCA, V., BOZZAO, L. & POZZILLI,  
501 C. 2004b. Enhanced brain motor activity in patients with MS after a single dose of 3,4-  
502 diaminopyridine. *Neurology*, 62, 2044-2050.
- 503 MANCINI, L., CICCARELLI, O., MANFREDONIA, F., THORNTON, J. S., AGOSTA, F., BARKHOF, F.,  
504 BECKMANN, C., DE STEFANO, N., ENZINGER, C., FAZEKAS, F., FILIPPI, M., GASS, A., HIRSCH, J.  
505 G., JOHANSEN-BERG, H., KAPPOS, L., KORTEWEG, T., MANSON, S. C., MARINO, S., MATTHEWS,  
506 P. M., MONTALBAN, X., PALACE, J., POLMAN, C., ROCCA, M., ROPELE, S., ROVIRA, A., WEGNER,

- 507 C., FRISTON, K., THOMPSON, A. & YOUSRY, T. 2009. Short-term adaptation to a simple motor  
508 task: A physiological process preserved in multiple sclerosis. *NeuroImage*, 45, 500-511.
- 509 OLDFIELD, R. C. 1971. The assessment and analysis of handedness: the Edinburgh inventory.  
510 *Neuropsychologia*, 9, 97-113.
- 511 PALING, D., PETERSEN, E. T., TOZER, D. J., ALTMANN, D. R., WHEELER-KINGSHOTT, C. A., KAPOOR, R.,  
512 MILLER, D. H. & GOLAY, X. 2014. Cerebral arterial bolus arrival time is prolonged in multiple  
513 sclerosis and associated with disability. *Journal of Cerebral Blood Flow & Metabolism*, 34, 34-  
514 42.
- 515 PALING, D., SOLANKY, B. S., RIEMER, F., TOZER, D. J., WHEELER-KINGSHOTT, C. A., KAPOOR, R., GOLAY,  
516 X. & MILLER, D. H. 2013. Sodium accumulation is associated with disability and a progressive  
517 course in multiple sclerosis. *Brain*, 136, 2305-2317.
- 518 PANTANO, P., PETSAS, N., TONA, F. & SBARDELLA, E. 2015. The role of fMRI to assess plasticity of the  
519 motor system in MS. *Frontiers in Neurology*, 6, 55.
- 520 RASHID, W., PARKES, L. M., INGLE, G. T., CHARD, D. T., TOOSY, A. T., ALTMANN, D. R., SYMMS, M. R.,  
521 TOFTS, P. S., THOMPSON, A. J. & MILLER, D. H. 2004. Abnormalities of cerebral perfusion in  
522 multiple sclerosis. *Journal of neurology, neurosurgery, and psychiatry*, 75, 1288-93.
- 523 REDDY, H., MATTHEWS, P. & LASSONDE, M. 2000. Functional MRI cerebral activation and deactivation  
524 during finger movement. *Neurology*, 55, 1244-1244.
- 525 ROCCA, M. A., COLOMBO, B., FALINI, A., GHEZZI, A., MARTINELLI, V., SCOTTI, G., COMI, G. & FILIPPI,  
526 M. 2005. Cortical adaptation in patients with MS: a cross-sectional functional MRI study of  
527 disease phenotypes. *The Lancet Neurology*, 4, 618-626.
- 528 ROCCA, M. A., PAGANI, E., ABSINTA, M., VALSASINA, P., FALINI, A., SCOTTI, G., COMI, G. & FILIPPI, M.  
529 2007. Altered functional and structural connectivities in patients with MS: A 3-T study.  
530 *Neurology*, 69, 2136-2145.
- 531 ROVARIS, M., IANNUCCI, G., FALAUTANO, M., POSSA, F., MARTINELLI, V., COMI, G. & FILIPPI, M. 2002.  
532 Cognitive dysfunction in patients with mildly disabling relapsing–remitting multiple sclerosis:  
533 an exploratory study with diffusion tensor MR imaging. *Journal of the neurological sciences*,  
534 195, 103-109.
- 535 SETHI, V., YOUSRY, T. A., MUHLERT, N., RON, M., GOLAY, X., WHEELER-KINGSHOTT, C., MILLER, D. H.  
536 & CHARD, D. T. 2012. Improved detection of cortical MS lesions with phase-sensitive inversion  
537 recovery MRI. *J Neurol Neurosurg Psychiatry*, 83, 877-882.
- 538 SHARMA, N., JONES, P. S., CARPENTER, T. A. & BARON, J. C. 2008. Mapping the involvement of BA 4a  
539 and 4p during Motor Imagery. *Neuroimage*, 41, 92-9.
- 540 STAFFEN, W., MAIR, A., ZAUNER, H., UNTERRAINER, J., NIEDERHOFER, H., KUTZELNIGG, A., RITTER, S.,  
541 GOLASZEWSKI, S., IGLSEDER, B. & LADURNER, G. 2002. Cognitive function and fMRI in patients  
542 with multiple sclerosis: evidence for compensatory cortical activation during an attention task.  
543 *Brain : a journal of neurology*, 125, 1275-1282.
- 544 STRICK, P. & PRESTON, J. B. 1982. Two representations of the hand in area 4 of a primate. II.  
545 Somatosensory input organization. *Journal of Neurophysiology*, 48, 150-159.
- 546 WARD, N. S. & FRACKOWIAK, R. S. 2003. Age-related changes in the neural correlates of motor  
547 performance. *Brain*, 126, 873-88.
- 548 WARD, N. S., NEWTON, J. M., SWAYNE, O. B., LEE, L., FRACKOWIAK, R. S., THOMPSON, A. J.,  
549 GREENWOOD, R. J. & ROTHWELL, J. C. 2007. The relationship between brain activity and peak  
550 grip force is modulated by corticospinal system integrity after subcortical stroke. *Eur J*  
551 *Neurosci*, 25, 1865-73.
- 552 WHITE, A. T., LEE, J. N., LIGHT, A. R. & LIGHT, K. C. 2009. Brain activation in multiple sclerosis: a BOLD  
553 fMRI study of the effects of fatiguing hand exercise. *Mult Scler*, 15, 580-6.

554

555

556  
557  
558  
559  
560  
561  
562  
563  
564

**Table 1** Grip force task performance, showing the average ( $\pm$ SD) MVC (%) and duration (s) of squeeze for healthy and MS subjects.

|                              | 20%              | 30%              | 40%              | 50%              | 60%              |
|------------------------------|------------------|------------------|------------------|------------------|------------------|
| <b>A. Healthy volunteers</b> |                  |                  |                  |                  |                  |
| MVC %                        | 21.23 $\pm$ 2.28 | 30.23 $\pm$ 1.68 | 39.26 $\pm$ 2.29 | 51.23 $\pm$ 1.28 | 59.11 $\pm$ 1.32 |
| Duration (s)                 | 2.89 $\pm$ 0.34  | 3.19 $\pm$ 0.33  | 3.11 $\pm$ 0.14  | 2.99 $\pm$ 0.51  | 3.13 $\pm$ 0.22  |
| <b>B. MS</b>                 |                  |                  |                  |                  |                  |
| MVC %                        | 22.32 $\pm$ 1.89 | 31.32 $\pm$ 1.34 | 40.17 $\pm$ 2.15 | 51.32 $\pm$ 1.49 | 60.39 $\pm$ 1.29 |
| Duration (s)                 | 3.04 $\pm$ 0.75  | 2.97 $\pm$ 0.95  | 3.25 $\pm$ 0.093 | 3.08 $\pm$ 0.693 | 3.32 $\pm$ 1.12  |

565  
566  
567  
568  
569  
570  
571  
572  
573  
574  
575  
576  
577  
578  
579  
580  
581

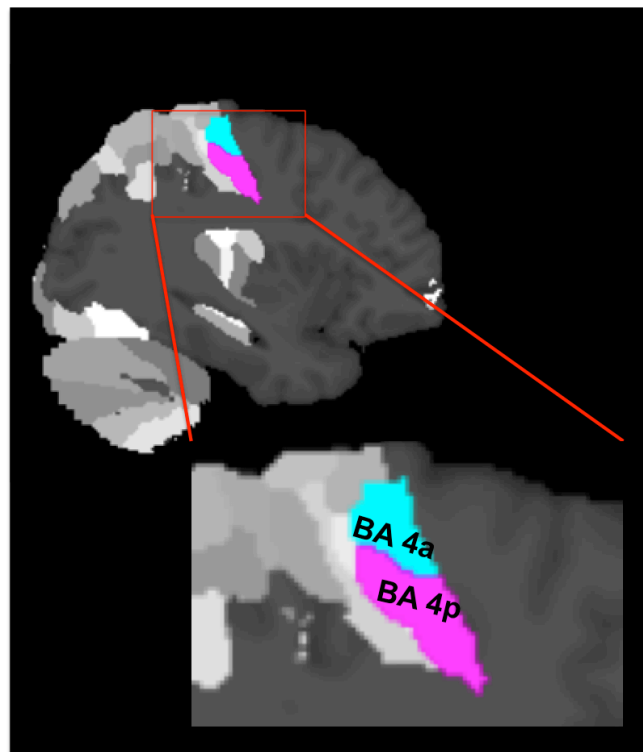

Figure 1: The cytoarchitectonic assignments of BA 4a and BA 4p projected onto the maximum probability map of the brain as provided by the SPM anatomy toolbox.

582  
583  
584  
585  
586  
587  
588  
589  
590  
591  
592  
593  
594  
595  
596  
597  
598  
599  
600

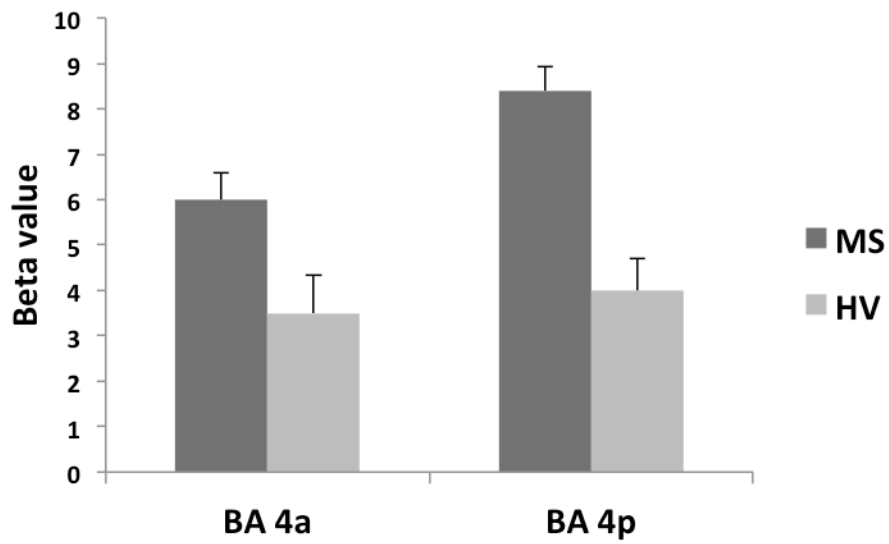

Figure 2: Mean of the beta values and their standard errors calculated at group level for the main effect of gripping for both groups and sub-regions. There are significantly higher betas in the MS compared to the Healthy volunteers within the sub-regions.

601  
602  
603

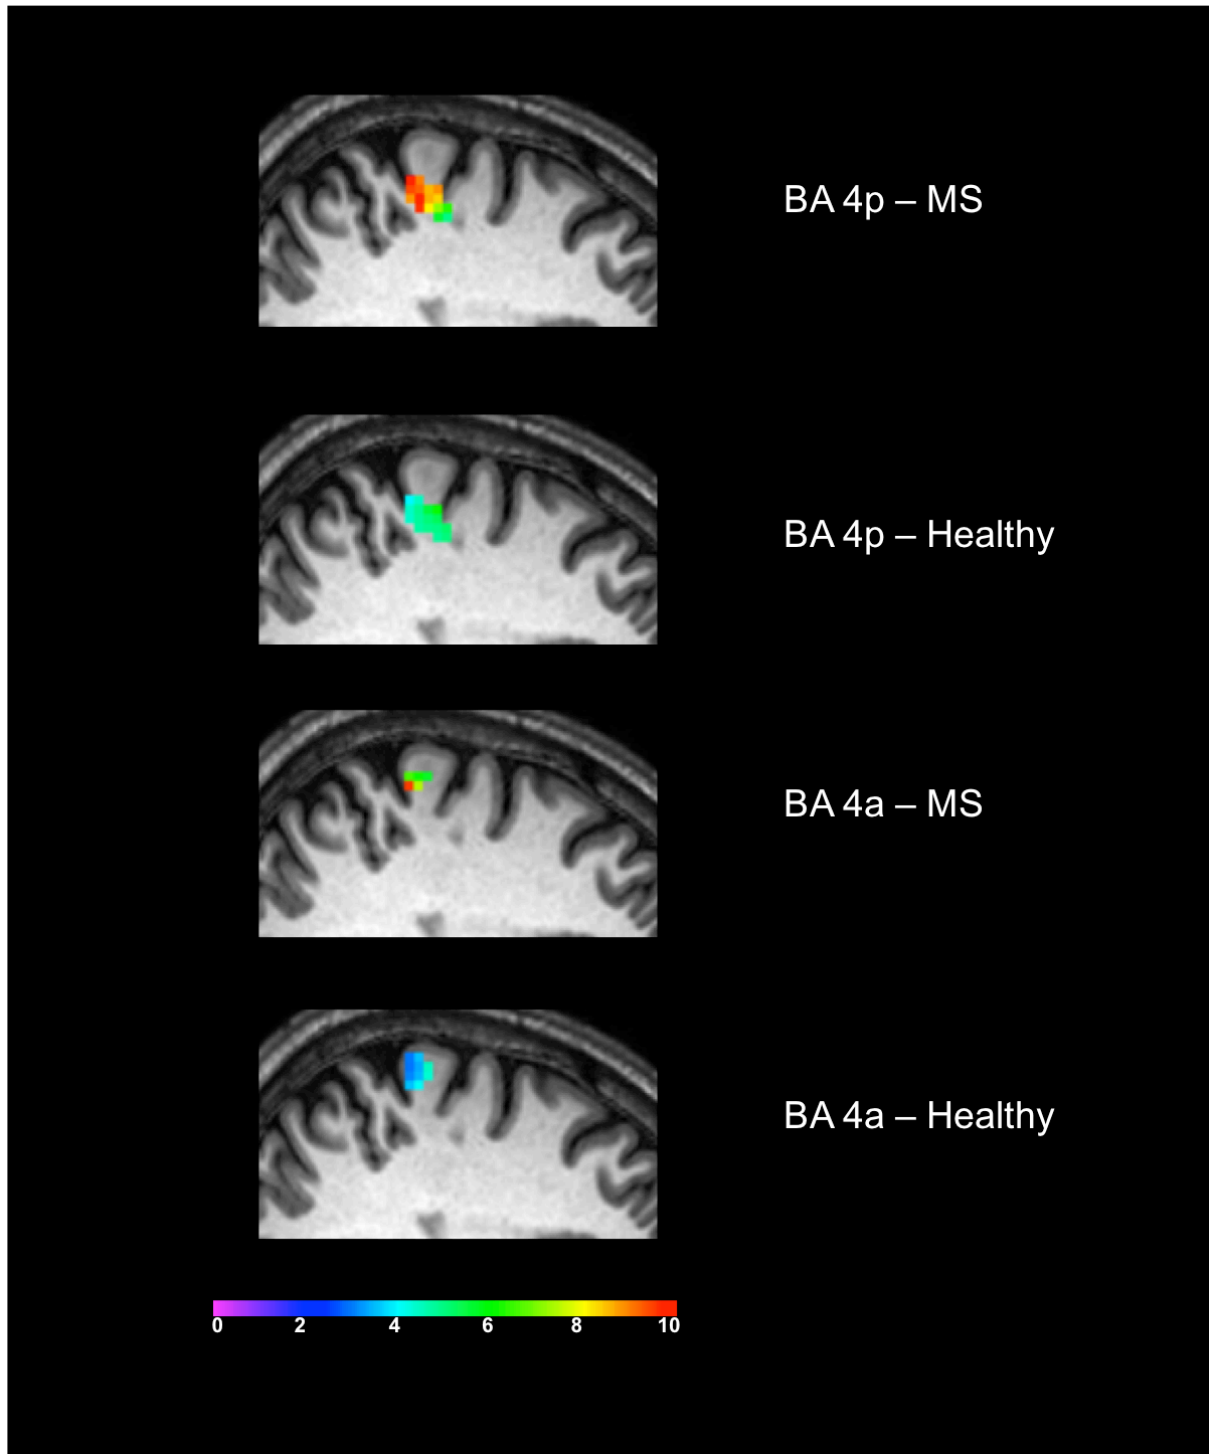

Figure 3: Significant activations of the main effect of gripping within BA 4p and BA 4a in both MS and Healthy volunteers. Colours represents the T-value of the effects at a 0.05 FWE.

604

605

606

607

608

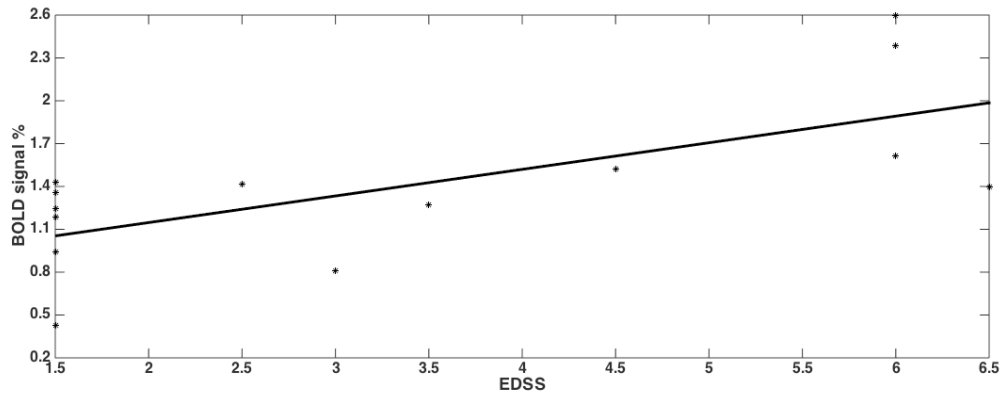

609

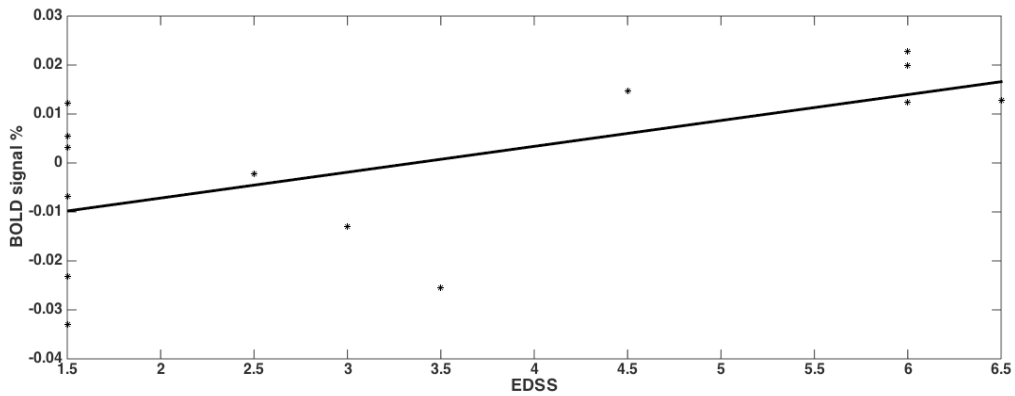

610

Figure 4: RRMS patients showed increased activations as their EDSS increased within BA 4p (p-value=0.001;r=0.68) (top plot) and within BA 4a (p-value=0.001;r=0.61) (bottom plot) in the main effect of gripping (i.e. 0<sup>th</sup> order).

611

612

613

614

615

616

617

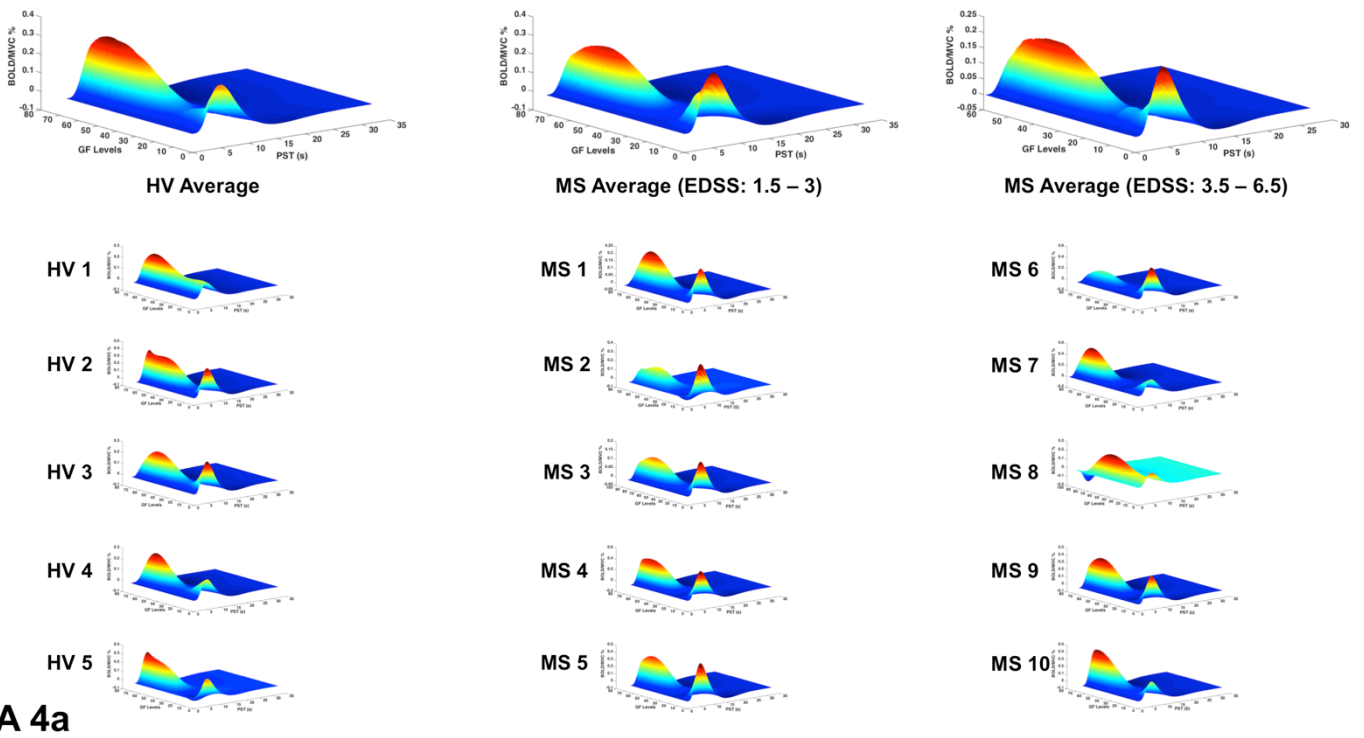

618

Figure 5: BOLD responses (Z-axis) of the fitted polynomial-orders of GF (Y-axis) at the defined post-stimulus time (PST) (X-axis) within BA 4a for Healthy volunteers (HV 1-5), MS patients with low (MS 1-5) and high EDSS (MS 6-10)—representing an estimate of the mapping between GF and BOLD based on all components of the polynomial expansion. The top row shows the average group effect while underneath examples of individual subjects are plotted.

619

620

621

622

623

624



625

626

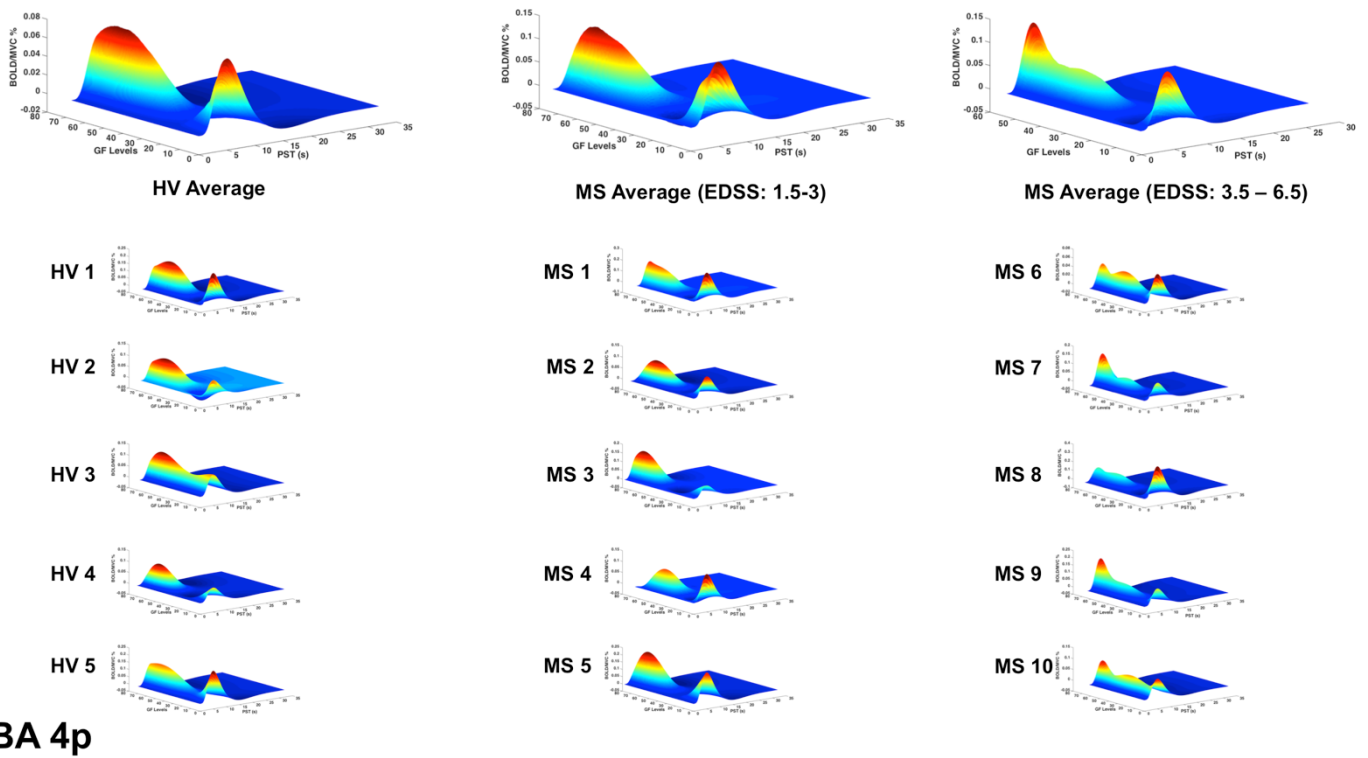

627

Figure 6: BOLD responses (Z-axis) of the fitted polynomial-orders of GF (Y-axis) at the defined post-stimulus time (PST) (X-axis) within BA 4p for Healthy volunteers (HV 1-5), MS patients with low (MS 1-5) and high EDSS (MS 6-10)—representing an estimate of the mapping between GF and BOLD based on all components of the polynomial expansion. The top row shows the average group effect while underneath examples of individual subjects are plotted.

628

629

630

631
